# Supplementary material for: Gene Set Enrichment Analysis Reveals That Fucoidan Induces Type I IFN Pathways in BMDC
Source: MDPI journal article supplement (doi:10.3390/nu14112242), 2022-05-27
Supplement: s1 [file s1]

## **Supplementary Materials**

Gene set enrichment analysis reveals that Fucoïdan induces type I IFN pathways in BMDC

**Figure S1.**

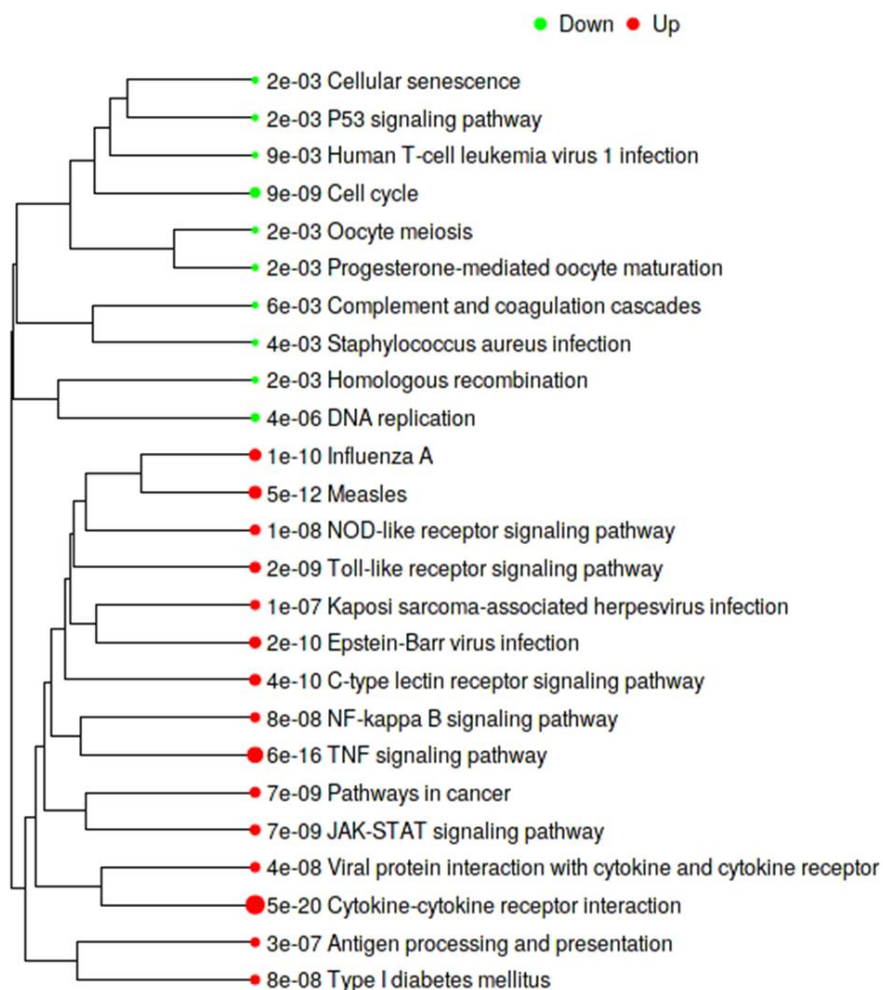

**Figure S1.** Visualization of the relationships between enriched KEGG pathways in DEGs using hierarchical clustering tree

**Table S1. Enriched TF Target gene sets among DEGs**

| <b>Direction</b> | <b>Pathways</b>      | <b>nGenes</b> | <b>adj.Pval</b> |
|------------------|----------------------|---------------|-----------------|
| Down             | Mcm2 target gene     | 56            | 6.70E-44        |
| Regulated        | Mcm3 target gene     | 56            | 1.10E-43        |
|                  | Mcm7 target gene     | 51            | 6.70E-39        |
|                  | Trip13 target gene   | 47            | 1.60E-37        |
|                  | Kntc1 target gene    | 54            | 2.30E-36        |
|                  | Foxm1 target gene    | 37            | 1.60E-33        |
|                  | Mcm4 target gene     | 45            | 1.60E-33        |
|                  | Mcm6 target gene     | 44            | 2.80E-33        |
|                  | Espl1 target gene    | 35            | 6.10E-31        |
|                  | Orc2 target gene     | 20            | 4.80E-14        |
|                  | Cenpk target gene    | 24            | 2.30E-13        |
|                  | Timeless target gene | 14            | 2.80E-12        |
|                  | Hmgb2 target gene    | 14            | 5.60E-10        |
|                  | Rb1 target gene      | 16            | 2.10E-07        |
|                  | Rfc1 target gene     | 7             | 7.80E-05        |
| Up               | Irf7 target gene     | 49            | 5.10E-34        |
| Regulated        | Stat1 target gene    | 100           | 7.30E-20        |
|                  | Nfkb1 target gene    | 54            | 1.70E-19        |
|                  | Irf9 target gene     | 28            | 3.20E-19        |
|                  | Irf5 target gene     | 24            | 9.10E-17        |
|                  | Rela target gene     | 59            | 3.10E-14        |
|                  | Irf1 target gene     | 56            | 4.50E-13        |
|                  | Irf8 target gene     | 18            | 4.20E-11        |
|                  | Relb target gene     | 14            | 4.90E-10        |
|                  | Irf6 target gene     | 14            | 6.10E-09        |
|                  | Pml target gene      | 18            | 1.80E-08        |
|                  | Ikbkg target gene    | 23            | 1.70E-07        |
|                  | Irf4 target gene     | 14            | 2.20E-07        |
|                  | Nfkbiz target gene   | 9             | 3.40E-07        |
|                  | Nfkb2 target gene    | 16            | 4.00E-07        |

Figure S2.

A

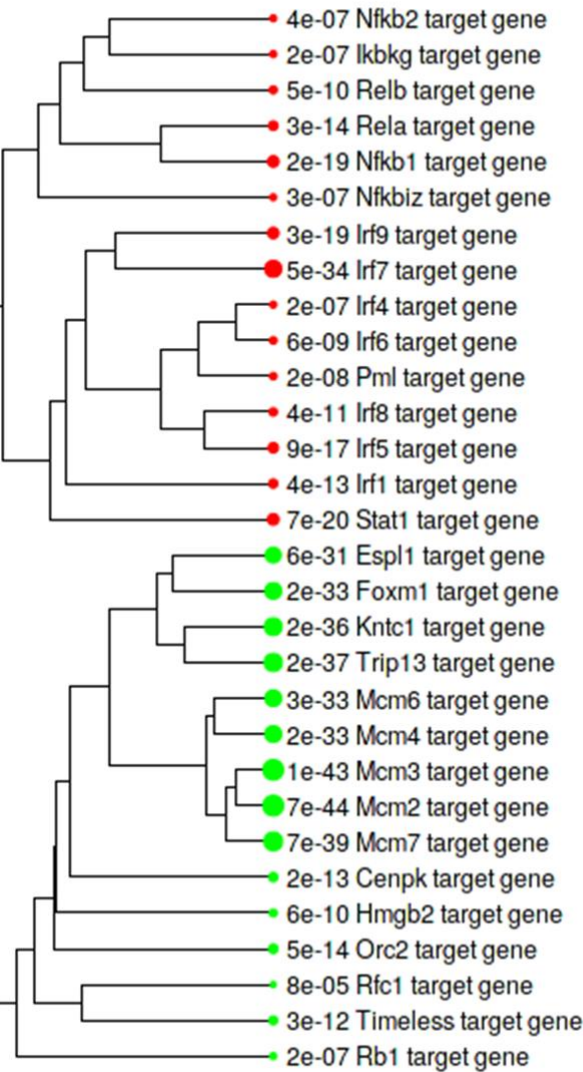

B

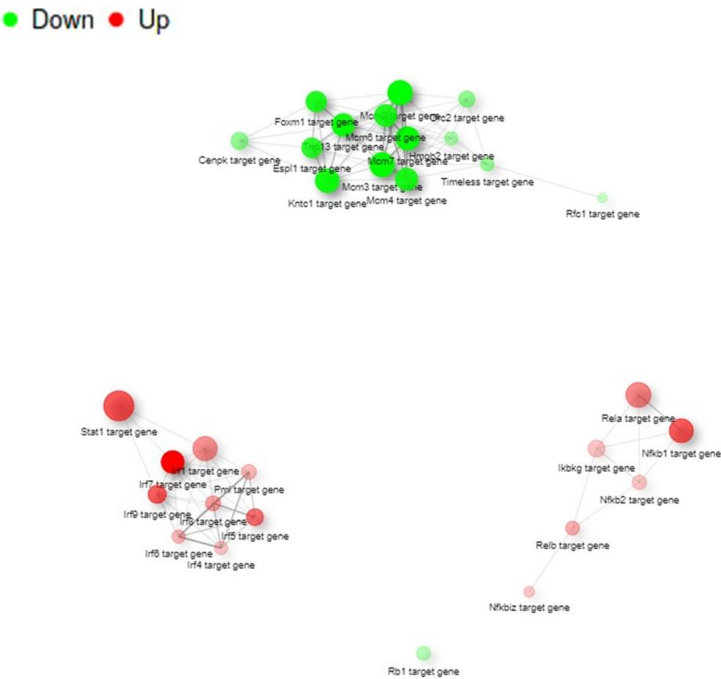

**Figure S2.** Visualization of the relationships between enriched TF target gene sets in DEGs using (A) tree and (B) network

**Table S2. Virus-specific immune pathways enriched in fucoidan-treated BMDCs**

| NAME                                                                               | SIZE | NES  | NOM p-val | FDR q-val |
|------------------------------------------------------------------------------------|------|------|-----------|-----------|
| BLANCO_MELO_COVID19_SARS_COV_2_INFECTION_CALU3_CELLS_UP                            | 277  | 2.36 | 0.000     | 0.000     |
| BLANCO_MELO_RESPIRATORY_SYNCYTIAL_VIRUS_INFECTION_A594_CELLS_UP                    | 242  | 2.33 | 0.000     | 0.000     |
| BLANCO_MELO_HUMAN_PARAINFLUENZA_VIRUS_3_INFECTION_A594_CELLS_UP                    | 165  | 2.32 | 0.000     | 0.000     |
| BLANCO_MELO_COVID19_BRONCHIAL_EPITHELIAL_CELLS_SARS_COV_2_INFECTION_UP             | 121  | 2.30 | 0.000     | 0.000     |
| BLANCO_MELO_BRONCHIAL_EPITHELIAL_CELLS_INFLUENZA_A_INFECTION_UP                    | 110  | 2.00 | 0.000     | 0.003     |
| WP_SARSCOV2_INNATE_IMMUNITY_EVASION_AND_CELLSPECIFIC_IMMUNE_RESPONSE               | 62   | 1.92 | 0.000     | 0.008     |
| BLANCO_MELO_COVID19_SARS_COV_2_INFECTION_A594_ACE2_EXPRESSING_CELLS_UP             | 400  | 1.92 | 0.000     | 0.009     |
| BLANCO_MELO_COVID19_SARS_COV_2_LOW_MOI_INFECTION_A594_ACE2_EXPRESSING_CELLS_UP     | 119  | 1.88 | 0.000     | 0.014     |
| ZHU_CMV_8_HR_UP                                                                    | 35   | 1.86 | 0.000     | 0.016     |
| WP_SARS_CORONAVIRUS_AND_INNATE_IMMUNITY                                            | 27   | 1.83 | 0.000     | 0.022     |
| WP_HOSTPATHOGEN_INTERACTION_OF_HUMAN_CORONA_VIRUSES_IN_INTERFERON_INDUCTION        | 32   | 1.82 | 0.000     | 0.023     |
| WP_TYPE_I_INTERFERON_INDUCTION_AND_SIGNALING_DURING_SARSCOV2_INFECTION             | 28   | 1.82 | 0.005     | 0.024     |
| BROWNE_HCMV_INFECTION_4HR_UP                                                       | 45   | 1.79 | 0.005     | 0.029     |
| VART_KSHV_INFECTION_ANGIOGENIC_MARKERS_UP                                          | 157  | 1.73 | 0.000     | 0.041     |
| BLANCO_MELO_COVID19_SARS_COV_2_INFECTION_A594_ACE2_EXPRESSING_CELLS_RUXOLITINIB_UP | 342  | 1.71 | 0.000     | 0.049     |
| BLANCO_MELO_COVID19_SARS_COV_2_INFECTION_A594_CELLS_UP                             | 71   | 1.69 | 0.000     | 0.052     |
| BROWNE_HCMV_INFECTION_6HR_UP                                                       | 56   | 1.69 | 0.006     | 0.053     |
| WP_STING_PATHWAY_IN_KAWASAKILIKE_DISEASE_AND_COVID19                               | 18   | 1.63 | 0.007     | 0.076     |
| KUROZUMI_RESPONSE_TO_ONCOCYTIC_VIRUS                                               | 42   | 1.61 | 0.006     | 0.083     |
| DORN_ADENOVIRUS_INFECTION_24HR_DN                                                  | 38   | 1.57 | 0.017     | 0.098     |
| DORN_ADENOVIRUS_INFECTION_32HR_DN                                                  | 36   | 1.56 | 0.016     | 0.103     |
| DORN_ADENOVIRUS_INFECTION_48HR_DN                                                  | 37   | 1.56 | 0.016     | 0.103     |
| DEBIASI_APOPTOSIS_BY_REOVIRUS_INFECTION_UP                                         | 258  | 1.51 | 0.000     | 0.122     |
| ZHU_CMV_ALL_UP                                                                     | 100  | 1.47 | 0.003     | 0.145     |
| DORN_ADENOVIRUS_INFECTION_12HR_UP                                                  | 25   | 1.41 | 0.056     | 0.178     |
| BROWNE_HCMV_INFECTION_12HR_UP                                                      | 93   | 1.40 | 0.009     | 0.180     |
| BLANCO_MELO_MERS_COV_INFECTION_MCR5_CELLS_DN                                       | 24   | 1.41 | 0.040     | 0.180     |
| KUROZUMI_RESPONSE_TO_ONCOCYTIC_VIRUS_AND_CYCLIC_RGD                                | 19   | 1.34 | 0.098     | 0.225     |
| WP_EBOLA_VIRUS_PATHWAY_ON_HOST                                                     | 103  | 1.33 | 0.013     | 0.229     |

**Table S3. PRR signaling pathways enriched in fucoidan-treated BMDCs**

| NAME                                                               | SIZE | NES  | NOM p-val | FDR q-val |
|--------------------------------------------------------------------|------|------|-----------|-----------|
| KEGG_RIG_I_LIKE_RECEPTOR_SIGNALING_PATHWAY                         | 63   | 1.76 | 0.003     | 0.036     |
| WP_TOLLLIKE_RECEPTOR_SIGNALING_PATHWAY                             | 99   | 1.74 | 0.000     | 0.039     |
| KEGG_TOLL_LIKE_RECEPTOR_SIGNALING_PATHWAY                          | 97   | 1.73 | 0.000     | 0.041     |
| WP_FIBRIN_COMPLEMENT_RECEPTOR_3_SIGNALING_PATHWAY                  | 42   | 1.70 | 0.000     | 0.051     |
| REACTOME_BINDING_AND_UPTAKE_OF_LIGANDS_BY_SCAVENGER_RECEPTORS      | 36   | 1.65 | 0.003     | 0.071     |
| WP_REGULATION_OF_TOLLLIKE_RECEPTOR_SIGNALING_PATHWAY               | 137  | 1.63 | 0.000     | 0.076     |
| WP_STING_PATHWAY_IN_KAWASAKILIKE_DISEASE_AND_COVID19               | 18   | 1.63 | 0.007     | 0.076     |
| KEGG_CYTOSOLIC_DNA_SENSING_PATHWAY                                 | 49   | 1.63 | 0.006     | 0.076     |
| WP_NOVEL_INTRACELLULAR_COMPONENTS_OF_RIGILIKE_RECEPTOR_RLR_PATHWAY | 57   | 1.59 | 0.003     | 0.088     |
| WP_TLR4_SIGNALING_AND_TOLERANCE                                    | 28   | 1.54 | 0.018     | 0.110     |
| KEGG_NOD_LIKE_RECEPTOR_SIGNALING_PATHWAY                           | 53   | 1.53 | 0.003     | 0.111     |
| REACTOME_DECTIN_1_MEDIATED_NONCANONICAL_NF_KB_SIGNALING            | 60   | 1.49 | 0.012     | 0.131     |
| REACTOME_CLEC7A_DECTIN_1_SIGNALING                                 | 97   | 1.46 | 0.003     | 0.151     |
| WP_CYTOSOLIC_DNASENSING_PATHWAY                                    | 65   | 1.44 | 0.009     | 0.163     |
| REACTOME_SCAVENGING_BY_CLASS_A_RECEPTORS                           | 18   | 1.40 | 0.079     | 0.180     |
| WP_TOLLLIKE_RECEPTOR_SIGNALING_RELATED_TO_MXD88                    | 32   | 1.36 | 0.055     | 0.207     |
| REACTOME_TOLL_LIKE_RECEPTOR_TLR1_TLR2_CASCADE                      | 100  | 1.35 | 0.010     | 0.217     |
| REACTOME_TOLL_LIKE_RECEPTOR_CASCADES                               | 148  | 1.30 | 0.004     | 0.249     |
| REACTOME_TOLL_LIKE_RECEPTOR_9_TLR9_CASCADE                         | 92   | 1.30 | 0.031     | 0.249     |

**Table S4. Leading edge genes within representative enrichment plots shown in Fig. 4b**

| <b>(Left)</b> |                             | <b>(Middle)</b> |                             | <b>(Right)</b> |                             |
|---------------|-----------------------------|-----------------|-----------------------------|----------------|-----------------------------|
| <b>GENE</b>   | <b>NA RUNNING<br/>ME ES</b> | <b>GENE</b>     | <b>NA RUNNING<br/>ME ES</b> | <b>GENE</b>    | <b>NA RUNNING<br/>ME ES</b> |
| ADAR          | 0.023                       | NFKBIA          | 0.068                       | IRF9           | 0.066                       |
| IRF8          | 0.057                       | TRAF6           | 0.119                       | DDX58          | 0.151                       |
| OAS2          | 0.085                       | NFKB1           | 0.175                       | STAT1          | 0.232                       |
| GBP2          | 0.115                       | OAS2            | 0.219                       | IFIH1          | 0.306                       |
| IRF9          | 0.146                       | IRF9            | 0.267                       | STAT2          | 0.378                       |
| STAT1         | 0.173                       | EIF2AK2         | 0.312                       | TBK1           | 0.442                       |
| OAS3          | 0.201                       | STAT1           | 0.359                       | IFNAR1         | 0.515                       |
| XAF1          | 0.224                       | OAS3            | 0.404                       | IKBKE          | 0.53                        |
| STAT2         | 0.249                       | STAT2           | 0.44                        | IFNAR2         | 0.574                       |
| SOCS3         | 0.276                       | TLR7            | 0.484                       | IFNB1          | 0.616                       |
| IFIT1         | 0.301                       | TBK1            | 0.517                       | TLR3           | 0.659                       |
| IRF4          | 0.326                       | IFNAR1          | 0.559                       | TICAM1         | 0.685                       |
| USP18         | 0.354                       | TREML4          | 0.597                       | JAK1           | 0.693                       |
| ISG15         | 0.378                       | IKBKG           | 0.636                       | TRAF3          | 0.69                        |
| RSAD2         | 0.405                       | IKBKE           | 0.633                       | IFNA4          | 0.712                       |
| MX2           | 0.431                       | IFNAR2          | 0.654                       |                |                             |
| IFNAR1        | 0.458                       | JUN             | 0.658                       |                |                             |
| IRF7          | 0.484                       | MAPK8           | 0.678                       |                |                             |
| IFIT2         | 0.509                       | IKBKB           | 0.701                       |                |                             |
| IFIT3         | 0.531                       |                 |                             |                |                             |
| BST2          | 0.55                        |                 |                             |                |                             |
| IFI35         | 0.573                       |                 |                             |                |                             |
| SOCS1         | 0.587                       |                 |                             |                |                             |
| ISG20         | 0.607                       |                 |                             |                |                             |
| IFITM3        | 0.61                        |                 |                             |                |                             |
| IFNAR2        | 0.623                       |                 |                             |                |                             |
| IFNB1         | 0.633                       |                 |                             |                |                             |
| IRF1          | 0.648                       |                 |                             |                |                             |
| PSMB8         | 0.663                       |                 |                             |                |                             |

**Figure S3.** Leading edge analysis of cluster A1 enriched genes

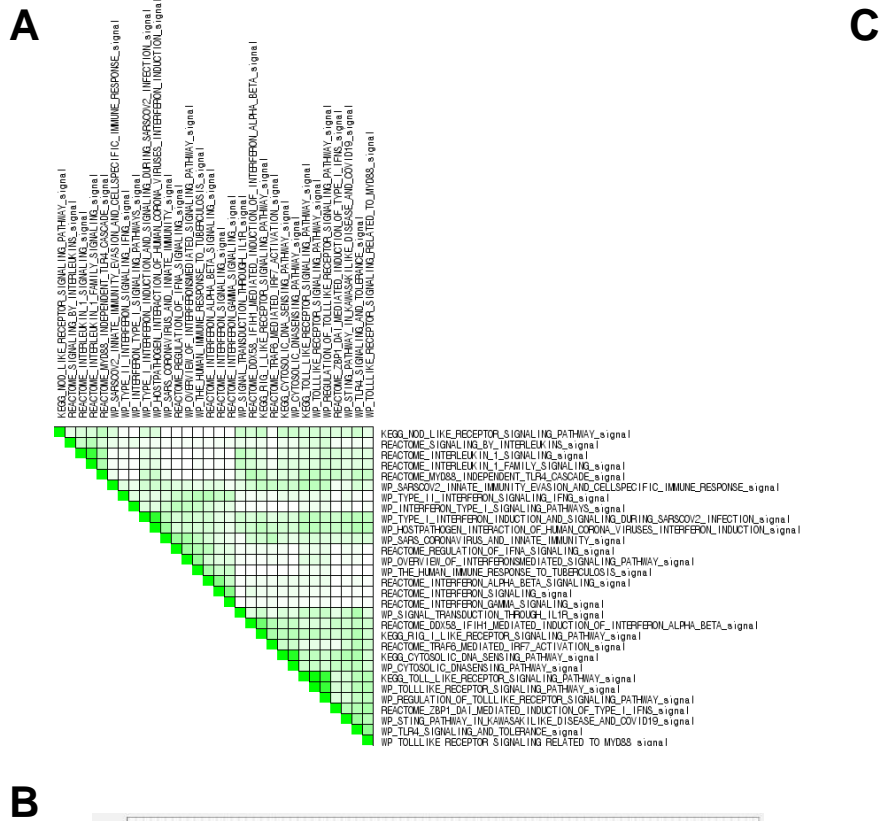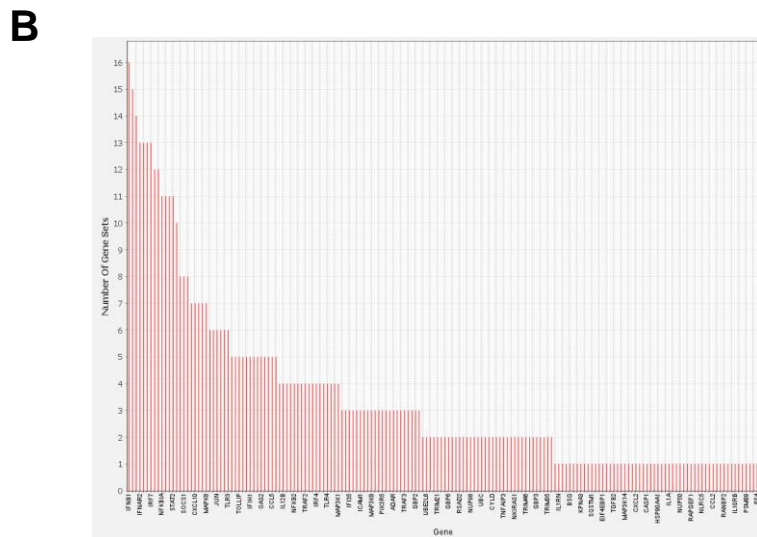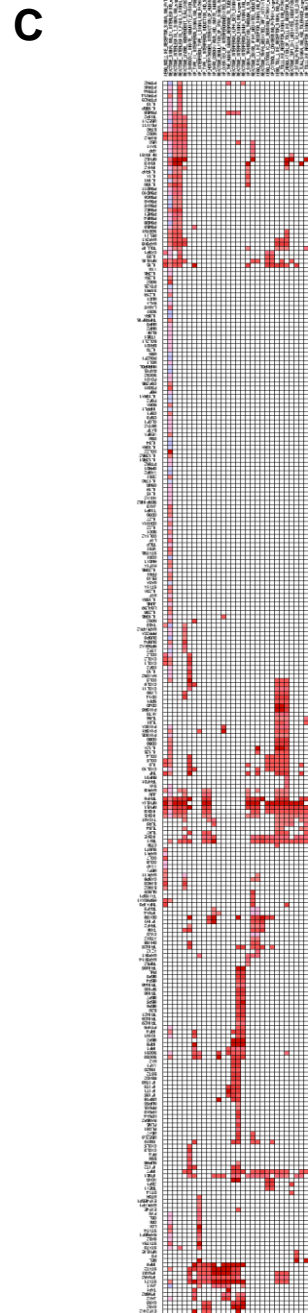



**Table S5. GSEA of TF targets in fucoidan vs control BMDCs**

| <b>NAME</b>          | <b>SIZE</b> | <b>NES</b> | <b>NOM p-val</b> | <b>FDR q-val</b> |
|----------------------|-------------|------------|------------------|------------------|
| ICSBP_Q6             | 239         | 1.69       | 0                | 0.09             |
| IRF2_01              | 119         | 1.6        | 0                | 0.116            |
| NFKB_Q6_01           | 228         | 1.41       | 0                | 0.127            |
| NFKAPPAB_01          | 241         | 1.41       | 0                | 0.135            |
| CREL_01              | 248         | 1.46       | 0.004            | 0.135            |
| STTTTCRNTTT_IRF_Q6   | 178         | 1.43       | 0                | 0.136            |
| STAT5A_01            | 236         | 1.38       | 0                | 0.136            |
| ARP1_01              | 149         | 1.37       | 0.008            | 0.138            |
| NFKB_Q6              | 242         | 1.42       | 0                | 0.139            |
| SREBP1_Q6            | 235         | 1.38       | 0.005            | 0.139            |
| GGGNNTTCC_NFKB_Q6_01 | 127         | 1.47       | 0                | 0.141            |
| IRF1_01              | 228         | 1.39       | 0.004            | 0.142            |
| NFAT_Q6              | 224         | 1.36       | 0                | 0.142            |
| IRF7_01              | 237         | 1.54       | 0                | 0.143            |
| NFKB_C               | 249         | 1.43       | 0                | 0.146            |
| IRF_Q6               | 229         | 1.36       | 0.005            | 0.147            |
| EN1_01               | 107         | 1.38       | 0.009            | 0.148            |
| E2F_Q6               | 210         | -1.81      | 0                | 0.001            |
| E2F1_Q3              | 221         | -1.82      | 0                | 0.001            |
| E2F1DP1RB_01         | 209         | -1.78      | 0                | 0.001            |
| E2F_Q4               | 213         | -1.79      | 0                | 0.001            |
| SGCGSSAAA_E2F1DP2_01 | 150         | -1.83      | 0                | 0.001            |
| E2F_02               | 214         | -1.74      | 0                | 0.001            |
| E2F_Q3               | 205         | -1.83      | 0                | 0.001            |
| E2F4DP2_01           | 214         | -1.73      | 0                | 0.001            |
| E2F1_Q4_01           | 208         | -1.77      | 0                | 0.001            |
| E2F1DP1_01           | 214         | -1.74      | 0                | 0.001            |
| E2F4DP1_01           | 216         | -1.83      | 0                | 0.001            |
| E2F_Q4_01            | 216         | -1.75      | 0                | 0.001            |
| E2F1DP2_01           | 214         | -1.72      | 0                | 0.002            |
| E2F1_Q6              | 212         | -1.83      | 0                | 0.002            |
| E2F_Q3_01            | 214         | -1.87      | 0                | 0.002            |
| E2F_Q6_01            | 218         | -1.68      | 0                | 0.002            |
| E2F1_Q6_01           | 223         | -1.66      | 0                | 0.003            |
| E2F_03               | 229         | -1.61      | 0                | 0.005            |
| E2F1_Q4              | 232         | -1.61      | 0                | 0.005            |
| E2F1_Q3_01           | 231         | -1.54      | 0                | 0.015            |
| KTGGYRSGAA_UNKNOWN   | 70          | -1.4       | 0.016            | 0.094            |
| NFY_C                | 218         | -1.4       | 0.001            | 0.097            |

**Table S6. Leading edge genes within LINDSTEDT DC maturation gene set enrichment plots in Fig. 5a**

| <b>A</b>         |                   | <b>B</b>         |                   | <b>C</b>         |                   |
|------------------|-------------------|------------------|-------------------|------------------|-------------------|
| <b>GENE NAME</b> | <b>RUNNING ES</b> | <b>GENE NAME</b> | <b>RUNNING ES</b> | <b>GENE NAME</b> | <b>RUNNING ES</b> |
| LAD1             | 0.050             | NR4A3            | 0.053             | LAD1             | 0.050             |
| COL14A1          | 0.091             | NFKBIA           | 0.087             | COL14A1          | 0.091             |
| STAT5A           | 0.132             | REL              | 0.122             | STAT5A           | 0.132             |
| ENPP4            | 0.169             | NFKB2            | 0.156             | ENPP4            | 0.169             |
| TNFSF4           | 0.203             | TNIP1            | 0.190             | TNFSF4           | 0.203             |
| LY75             | 0.233             | CD83             | 0.215             | LY75             | 0.233             |
| SYNGR3           | 0.265             | CD80             | 0.244             | SYNGR3           | 0.265             |
| STK39            | 0.292             | MARCKSL1         | 0.273             | STK39            | 0.292             |
| CD86             | 0.320             | NFKB1            | 0.302             | CD86             | 0.320             |
| CD200            | 0.341             | PSME2            | 0.330             | CD200            | 0.341             |
| LGALS9           | 0.349             | BIRC3            | 0.356             | LGALS9           | 0.349             |
| ATF3             | 0.372             | CYTIP            | 0.384             | ATF3             | 0.372             |
| TNFRSF11B        | 0.395             | TNFAIP3          | 0.412             | TNFRSF11B        | 0.395             |
| SEMA7A           | 0.416             | DUSP4            | 0.438             | SEMA7A           | 0.416             |
| NID1             | 0.434             | CFLAR            | 0.464             | NID1             | 0.434             |
| STAT3            | 0.446             | TRAF1            | 0.482             | STAT3            | 0.446             |
| FOXO1            | 0.467             | TNFRSF9          | 0.503             | FOXO1            | 0.467             |
| NFIL3            | 0.478             | SLAMF1           | 0.522             | NFIL3            | 0.478             |
| FERMT2           | 0.496             | IL2RA            | 0.545             | FERMT2           | 0.496             |
| TRAFFD1          | 0.509             | IL15RA           | 0.568             | TRAFFD1          | 0.509             |
| SOCS2            | 0.525             | TAP1             | 0.581             | SOCS2            | 0.525             |
| ARID5A           | 0.538             | SDC4             | 0.602             | ARID5A           | 0.538             |
| GTF2E2           | 0.550             | JRK              | 0.624             | GTF2E2           | 0.550             |
| PLAGL1           | 0.566             | ADM              | 0.644             | PLAGL1           | 0.566             |
| S1PR1            | 0.577             | USP12            | 0.663             | S1PR1            | 0.577             |
| PRKAR2B          | 0.582             | BTG1             | 0.678             | PRKAR2B          | 0.582             |
| FLT3             | 0.578             | OPTN             | 0.694             | FLT3             | 0.578             |
| MUC1             | 0.583             | TNFAIP2          | 0.697             | MUC1             | 0.583             |
| TNFRSF11A        | 0.583             | MAP3K14          | 0.715             | TNFRSF11A        | 0.583             |
| ROCK2            | 0.589             | PDGFA            | 0.718             | ROCK2            | 0.589             |
| JAK1             | 0.595             | ID2              | 0.734             | JAK1             | 0.595             |
|                  |                   | PNRC1            | 0.745             |                  |                   |
|                  |                   | HIVEP1           | 0.747             |                  |                   |
